# Supplementary material for: Mangiferin- and GNPs/ECPP-loaded platform of UH with dual bi-directional dynamic modulation of stem cells/macrophages and osteoblasts/osteoclasts for the prevention of aseptic loosening
Source: Royal Society of Chemistry journal article supplement (doi:10.1039/d4tb02079k), 2024-11-18
Supplement: d4tb02079k1.pdf [file d4tb02079k1.pdf]

## Mangiferin, GNPs/ECPP-loaded platform of UH with dual bi-directional dynamic modulation of stem cells/macrophages, osteoblasts/osteoclasts for the prevention of aseptic loosening

Shaoxiong Feng<sup>a</sup>, Ningning Lei<sup>a</sup>, Xu Peng<sup>a, b</sup>, Xu Wei<sup>a</sup>, Yihao Luo<sup>a</sup>, Xinyun Pu<sup>a</sup>, Xixun Yu<sup>a</sup> \*

*a. College of Polymer Science and Engineering, Sichuan University, Chengdu 610065, P.R. China.*

*b. Experimental and Research Animal Institute, Sichuan University, Chengdu 610065, P.R. China.*

Correspondence to: yuxixun@163.com

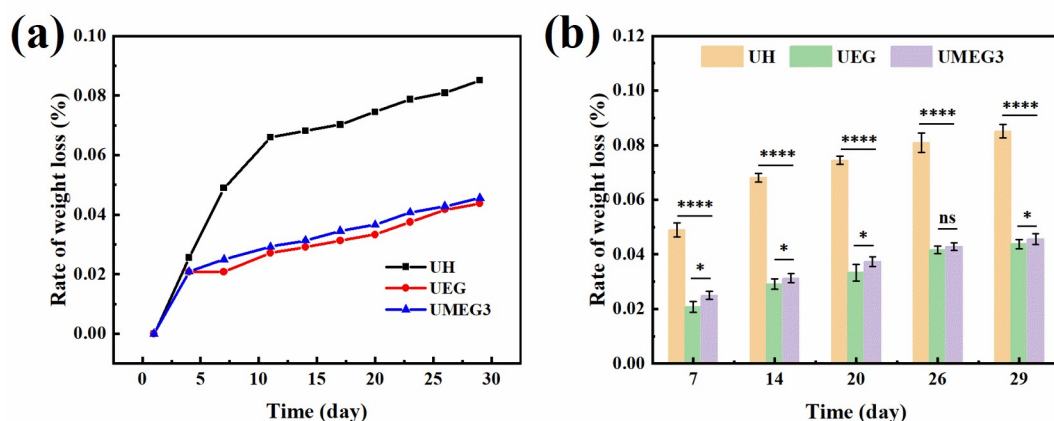

Fig.S1 (a) The degradation weight loss curve of different acetabular cup materials under SBF environment; (b) The degradation weight loss rate of different acetabular cup materials in SBF environment
